# Supplementary material for: Lithium degradation in lithium–sulfur batteries: insights into inventory depletion and interphasial evolution with cycling
Source: Royal Society of Chemistry journal article supplement (doi:10.1039/d0ee01074j), 2020-01-01
Supplement: d0ee01074j1.pdf [file d0ee01074j1.pdf]

## SUPPLEMENTARY INFORMATION

### Lithium Degradation in Lithium-Sulfur Batteries: Insights into Inventory Depletion and Interphasial Evolution with Cycling

Sanjay Nanda and Arumugam Manthiram\*

*Materials Science and Engineering Program and Texas Materials Institute, The University of Texas at Austin, Austin, TX78712, USA*

\*Corresponding author: Tel: +1-512-471-1791; fax: +1-512-471-7681.

E-mail address: manth@austin.utexas.edu (A. Manthiram)

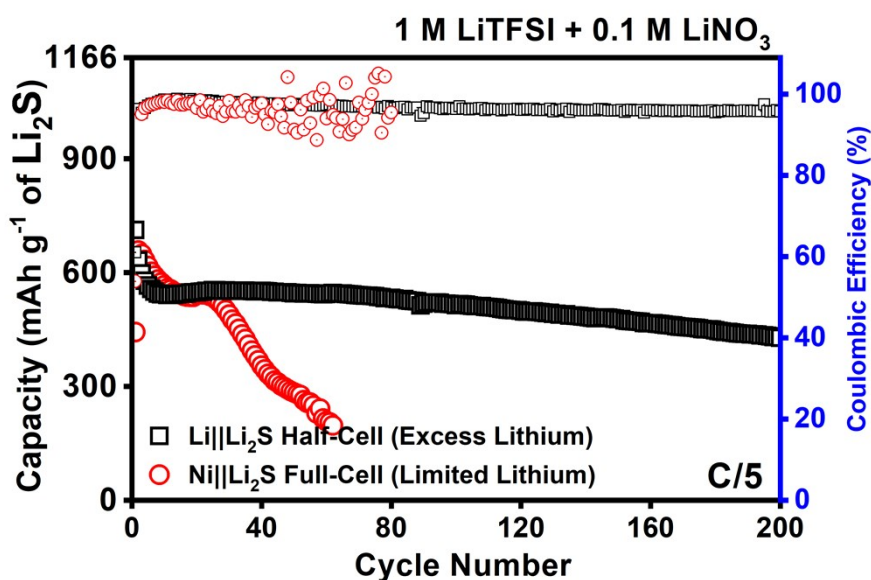

**Fig. S1.** Electrochemical performance of the Li || Li<sub>2</sub>S half cell and anode-free Ni || Li<sub>2</sub>S full cell at C/5 (1 mA cm<sup>-2</sup>) rate, shown here for an extended cycling period of 200 cycles. The increase in applied current leads to poor efficiencies of lithium plating stripping, which brings about faster capacity fade at C/5 rate compared to C/10 rate. The lithium inventory loss rate (LILR) increases from 0.6% per cycle at C/10 rate to 1.8% per cycle at C/5 rate. Meanwhile, the half cell shows minor changes in electrochemical performance from C/10 rate to C/5 rate, with the sulfur inventory loss rate only increasing from 0.2% per cycle to 0.3% per cycle. Thus, the constraints on electrochemical performance imposed by a limited lithium inventory become more apparent at a higher current rate.

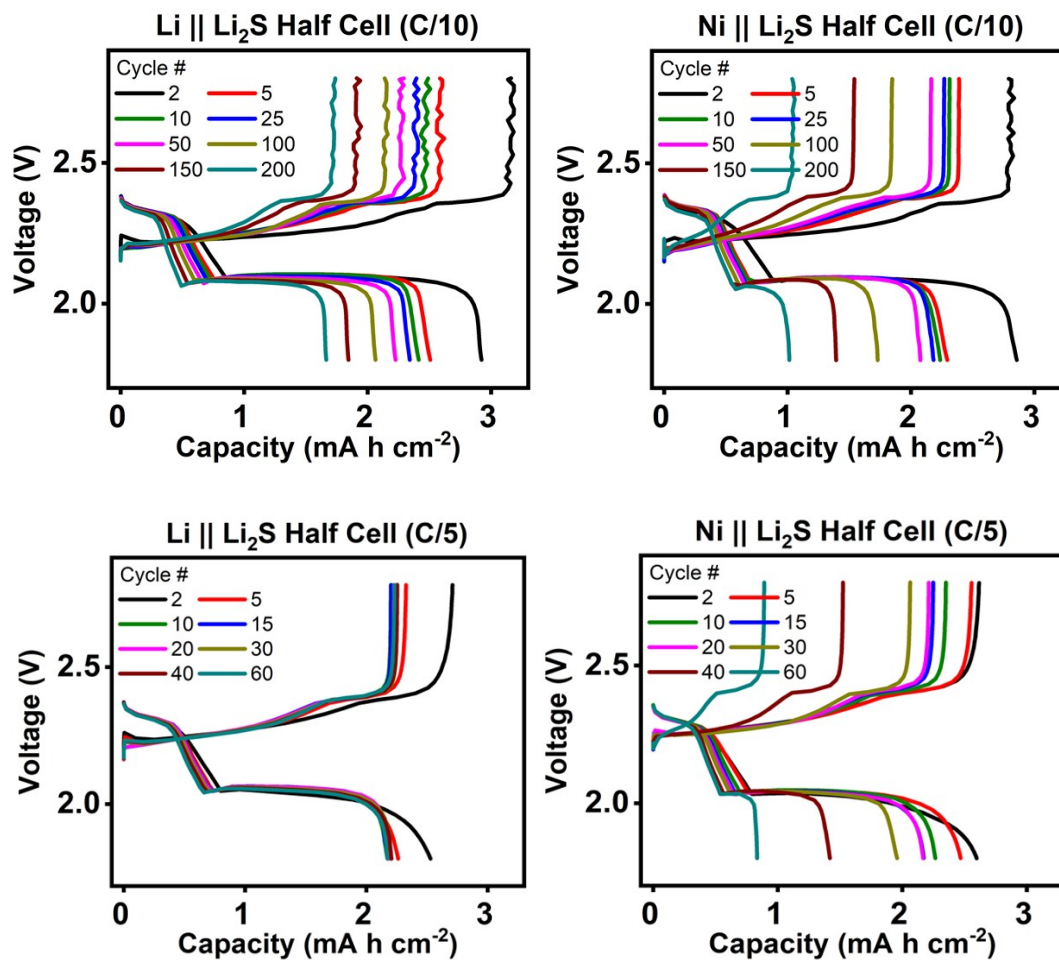

**Fig. S2.** Charge/discharge curves showing the increase in polarization for the Li || Li<sub>2</sub>S half cell and anode-free Ni || Li<sub>2</sub>S full cell at C/10 rate. Different cycle numbers from 2 to 200 cycles are covered. Charge/discharge curves are also shown to demonstrate the increase in polarization for the Li || Li<sub>2</sub>S half cell and anode-free Ni || Li<sub>2</sub>S full cell at C/5 rate. Different cycle numbers from 2 to 60 cycles are covered.

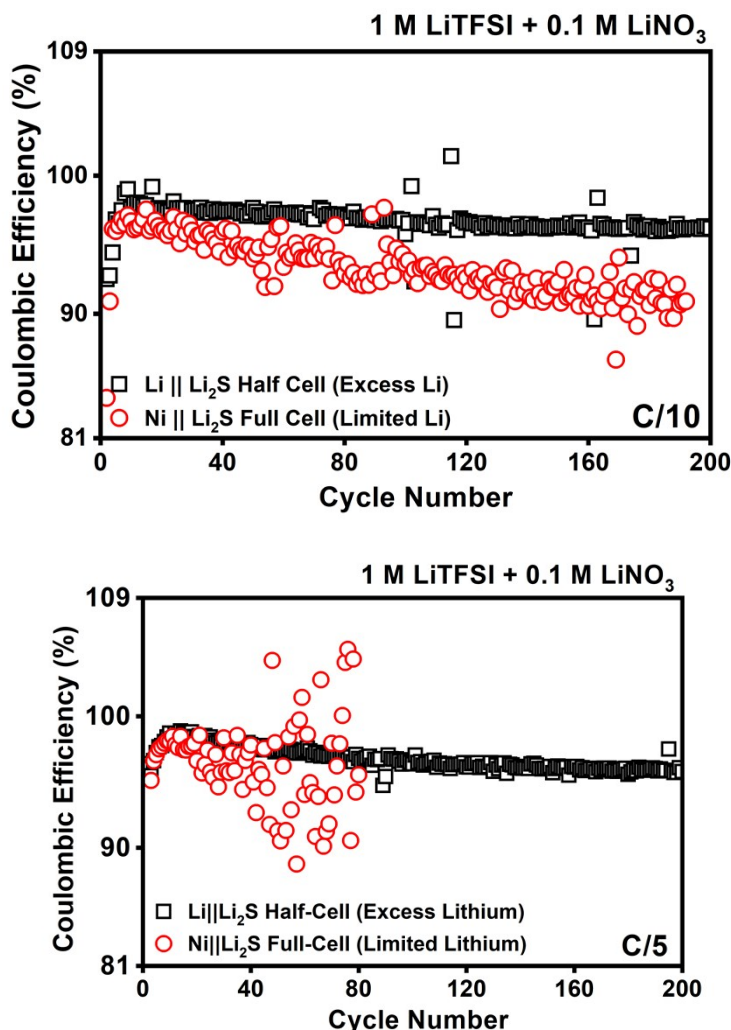

**Fig. S3.** Coulombic efficiency values for Li || Li<sub>2</sub>S half cells and anode-free Ni || Li<sub>2</sub>S full cells cycled at C/10 (0.5 mA cm<sup>-2</sup>) and C/5 (1 mA cm<sup>-2</sup>) current rates. While the half cells show stable CE values with a general downward trend but with little cycle-to-cycle variation, the anode-free full cells show both a steeper decline in CE values and significantly higher cycle-to-cycle variation. In the advanced stages of cycling, the CE values for the anode-free full cells show erratic fluctuations, indicating cell failure. It should be noted here that the values of Coulombic efficiency significantly overstate the actual lithium inventory loss per cycle as calculated in Fig. 1. The geometric mean of the measured CE values at C/10 rate is 94.9% over 100 cycles, while that at C/5 rate is 96.7% over 40 cycles. If Coulombic efficiency was a perfect predictor of capacity fade, this would imply a lithium inventory loss rate per cycle of 5.1% at C/10 rate and 3.3% at C/5 rate. However, the actual values of lithium inventory loss rates per cycle are 0.6% at C/10 rate and 1.8% at C/5 rate. The discrepancy between the measured values of Coulombic efficiency and actual values of lithium inventory loss rate is due to the internal redox shuttle that is intrinsic to Li-S batteries because of polysulfide intermediates.

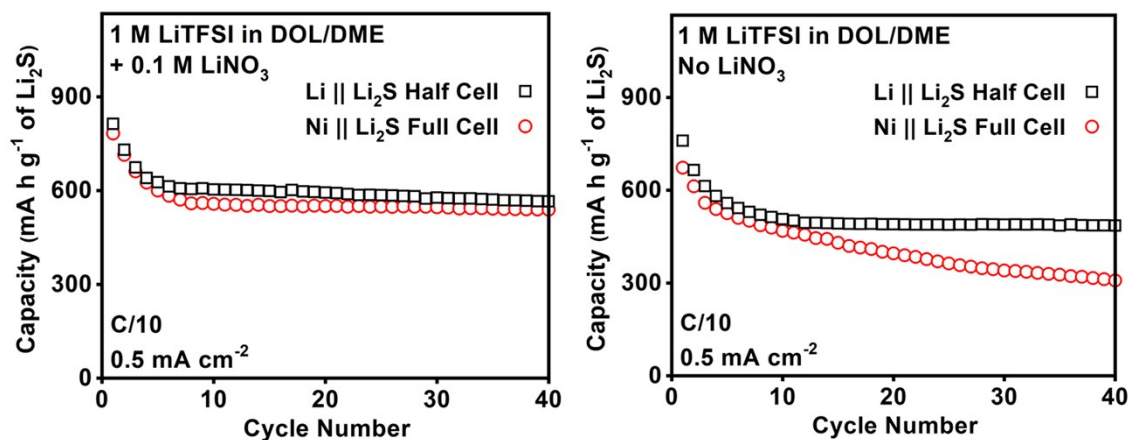

**Fig. S4.** Electrochemical performance of Li || Li<sub>2</sub>S half cells and anode-free Ni || Li<sub>2</sub>S full cells cycled with LiNO<sub>3</sub>-free electrolytes at C/10 rate (0.5 mA cm<sup>-2</sup>). In the half cell configuration, the LiNO<sub>3</sub>-free electrolyte shows stable cycling for over 40 cycles. In the full cell configuration, however, the LiNO<sub>3</sub>-free electrolyte shows a steady decline in capacities, which diverge from the half cell capacities after ~ 10 cycles. This relative trend is in sharp contrast to that observed for the electrolyte with LiNO<sub>3</sub>.

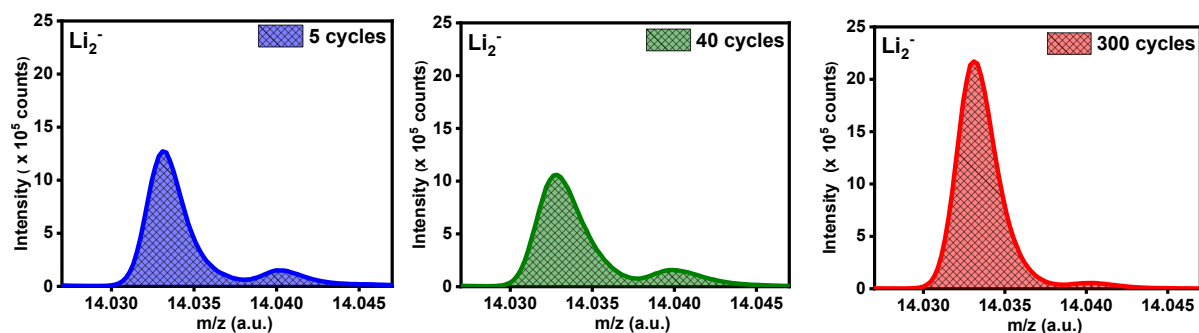

**Fig. S5.** Integrated intensity for Li<sub>2</sub><sup>-</sup> secondary ions in the anode-free Ni || Li<sub>2</sub>S full cell after 5, 40, and 300 cycles. Unlike the data shown in Fig. 2a, the intensities in this figure are not scaled with respect to the total ion count registered throughout the sample depth. While the peak area for Li<sub>2</sub><sup>-</sup> is significantly higher at 300 cycles compared to 5 and 40 cycles, it should be noted that the total ion count is also roughly two times higher at 300 cycles compared to 5 and 40 cycles. Nevertheless, this figure proves that the main conclusion drawn in Fig. 2, i.e., significant amount of metallic lithium is present even at advanced stages of cycling after cell failure is not an artifact of the normalization process.

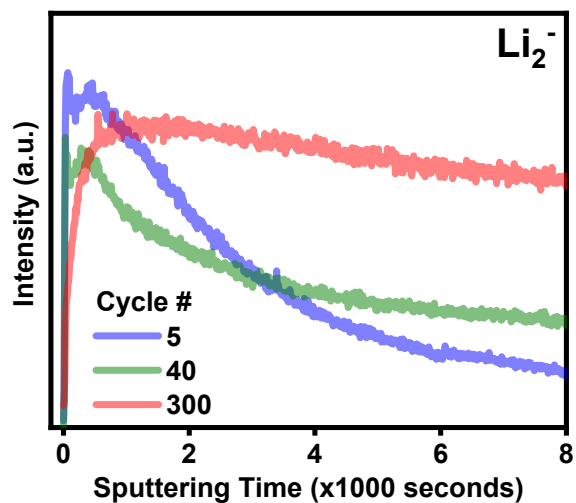

**Fig. S6.** Depth profiles for  $\text{Li}_2^-$  secondary ions as a function of sputtering time in the anode-free  $\text{Ni} \parallel \text{Li}_2\text{S}$  full cell after 5, 40, and 300 cycles. Unlike the data shown in Fig. 2d, the measured signal is not normalized with respect to the total signal for all secondary ions. Even without the normalization, a significant amount of metallic lithium is observed at 300 cycles. Like the figure above, this shows that the main conclusion drawn in Fig. 2 is not an artifact of the normalization process.

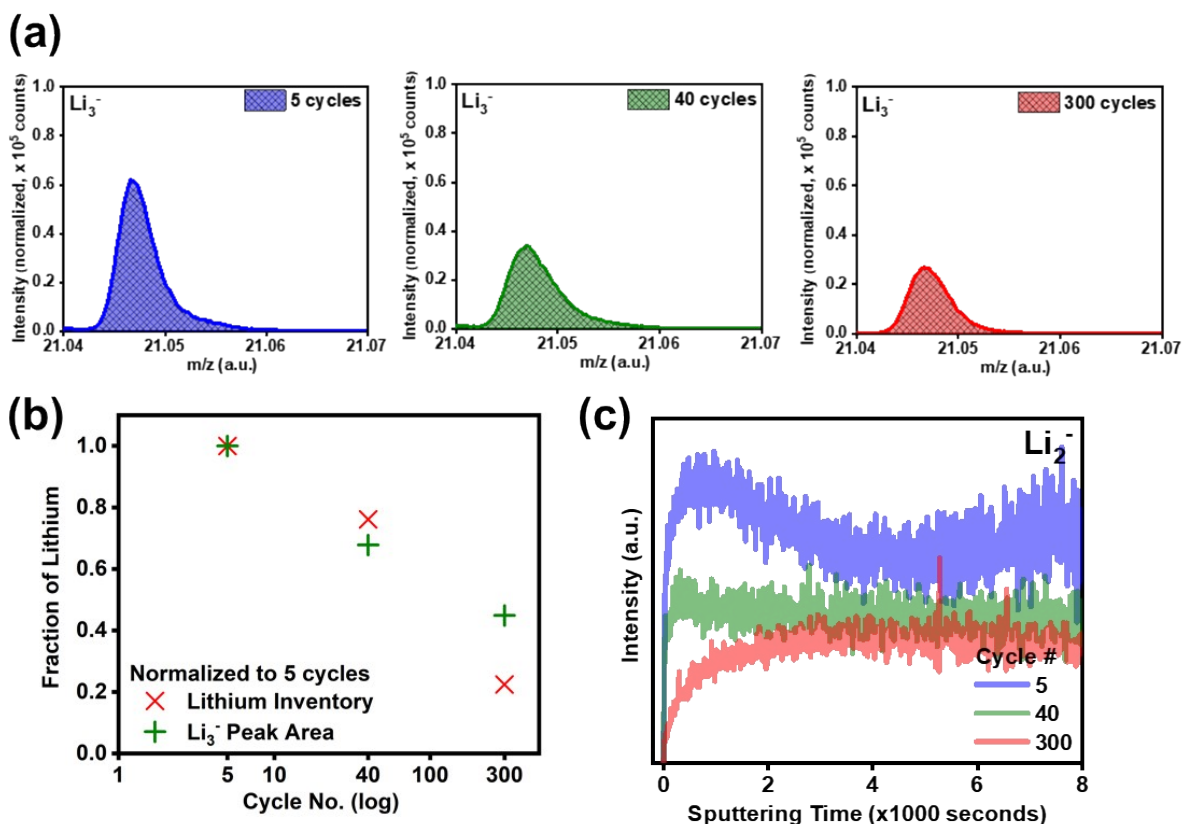

**Fig. S7.** (a) Integrated intensity for  $\text{Li}_3^-$  secondary ions in the anode-free Ni ||  $\text{Li}_2\text{S}$  full cell after 5, 40, and 300 cycles. Similar to  $\text{Li}_2^-$ ,  $\text{Li}_3^-$  is also an indicator for metallic lithium. The intensities are scaled with respect to the total ion count registered throughout the sample depth. A progressive reduction in peak area is observed with cycling, although a significant integrated intensity for  $\text{Li}_3^-$  is still detected at 300 cycles. (b) Lithium inventory retained and total peak area for  $\text{Li}_3^-$  at 40 and 300 cycles as a fraction of that at 5 cycles. At 300 cycles, a significantly higher peak area for  $\text{Li}_3^-$  is detected compared to the lithium inventory retained. This indicates the presence of a considerable amount of “dead” metallic lithium. (c) Depth profiles for  $\text{Li}_3^-$  secondary ions as a function of sputtering time at 5, 40, and 300 cycles. The signals are normalized with respect to the total signal for all secondary ions. Since the signal for  $\text{Li}_3^-$  is very noisy,  $\text{Li}_2^-$  secondary ions are chosen in this work as a proxy for metallic lithium. Nevertheless, the relative trend for integrated peak intensities and depth profiles of  $\text{Li}_3^-$  at 5, 40, and 300 cycles are similar to that for  $\text{Li}_2^-$ .

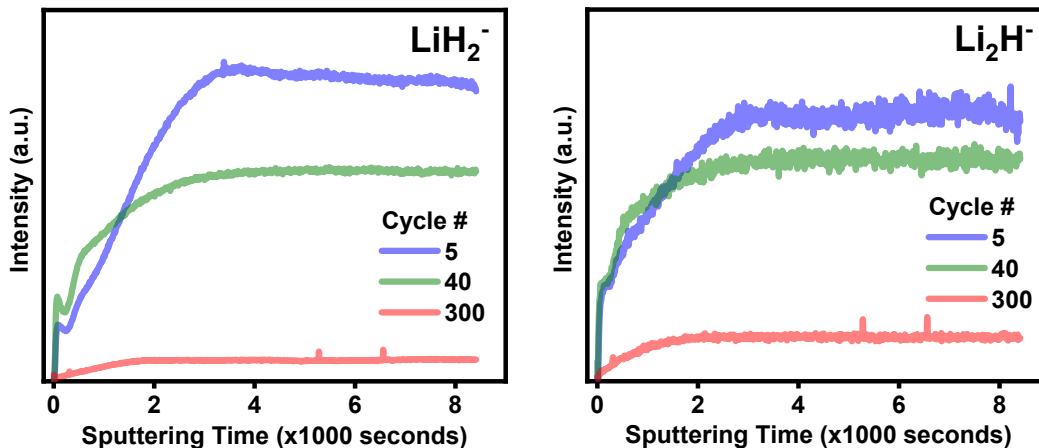

**Fig. S8.** Depth profiles for  $\text{LiH}_2^-$  and  $\text{Li}_2\text{H}^-$  secondary ions as a function of sputtering time at 5, 40, and 300 cycles. The signals are normalized with respect to the total signal for all secondary ions. Similar depth profiles are observed as those for  $\text{H}^-$  and  $\text{LiH}^-$  secondary ions, which indicates that a sharp boundary between lithium metal and  $\text{LiH}$  may not be present. Species with intermediate composition between  $\text{Li}$  and  $\text{LiH}$  are likely present in the interface. Nevertheless, a reduction in signal intensity is observed with cycling, which is ascribed to possible gas evolution during cell operation.

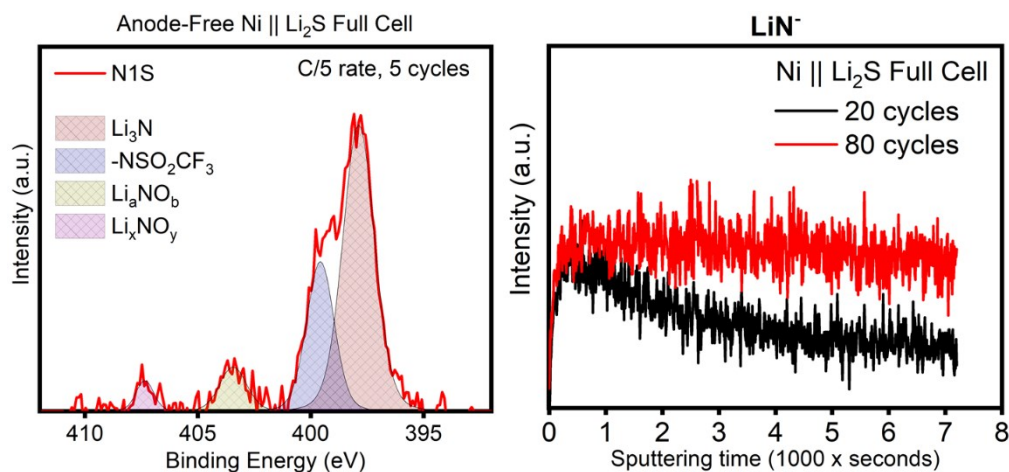

**Fig. S9.**  $\text{N}1\text{s}$  spectra for the deposited lithium in anode-free  $\text{Ni} \parallel \text{Li}_2\text{S}$  full cell cycled at  $\text{C}/5$  rate for 5 cycles. Four peaks can be observed corresponding to nitrogen-containing interphasial components. In order of signal intensity, they are  $\text{Li}_3\text{N}$  ( $\sim 397.5$  eV),  $-\text{NSO}_2\text{CF}_3$  ( $\sim 399.8$  eV), and two oxidized nitrogen species at  $\sim 403.8$  and  $\sim 407.5$  eV. ToF-SIMS depth profile for  $\text{LiN}^-$  secondary ion (corresponding to  $\text{Li}_3\text{N}$ ) is also shown at 20 cycles and 80 cycles (at  $\text{C}/5$ ), indicating a relatively uniform distribution throughout the deposited lithium and an increase in  $\text{Li}_3\text{N}$  concentration with cycling.

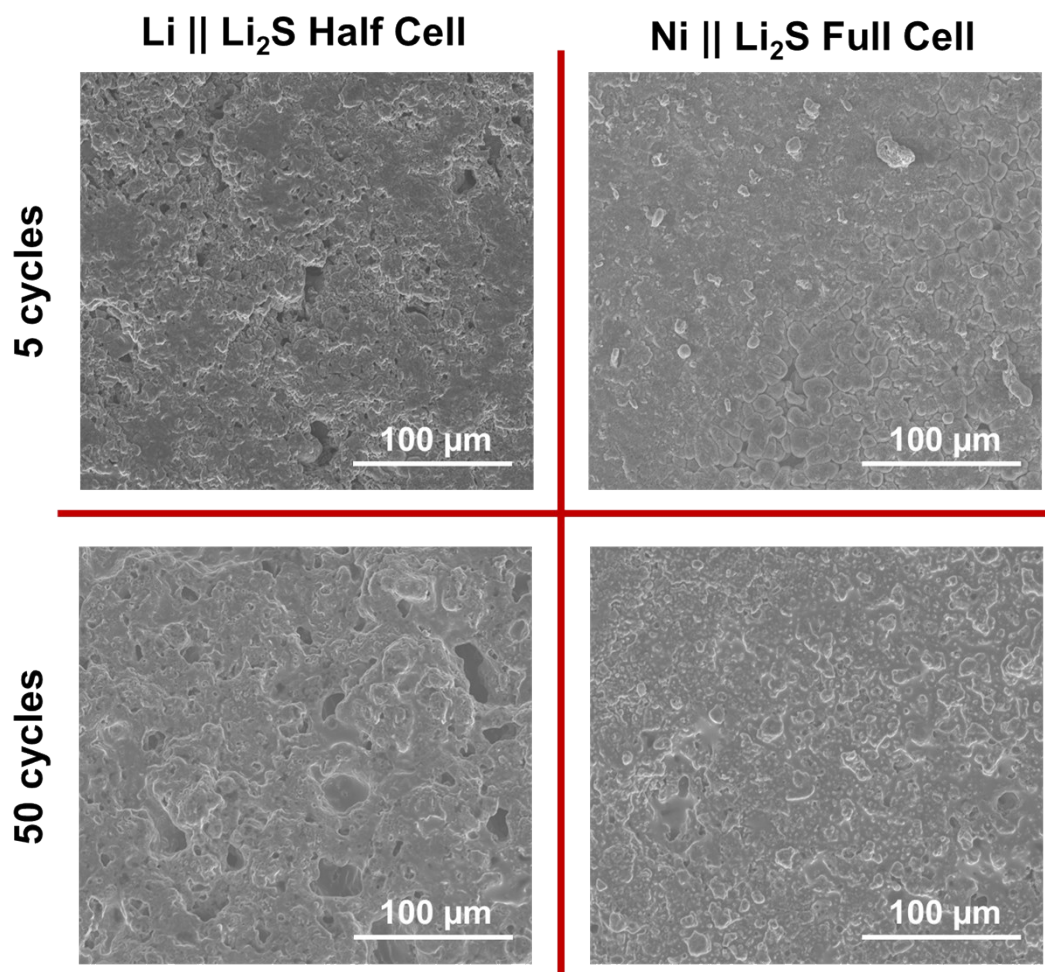

**Fig. S10.** SEM images of deposited lithium in Li || Li<sub>2</sub>S half cells and anode-free Ni || Li<sub>2</sub>S full cells cycled at C/5 rate after 5 and 50 cycles. Significant differences in morphology between the half cell and the full cell cannot be discerned. Both systems show relatively smooth and homogenous deposition of lithium at 5 cycles. By 50 cycles, however, the morphology of the plated lithium has deteriorated, and a significantly more non-uniform lithium surface can be observed.



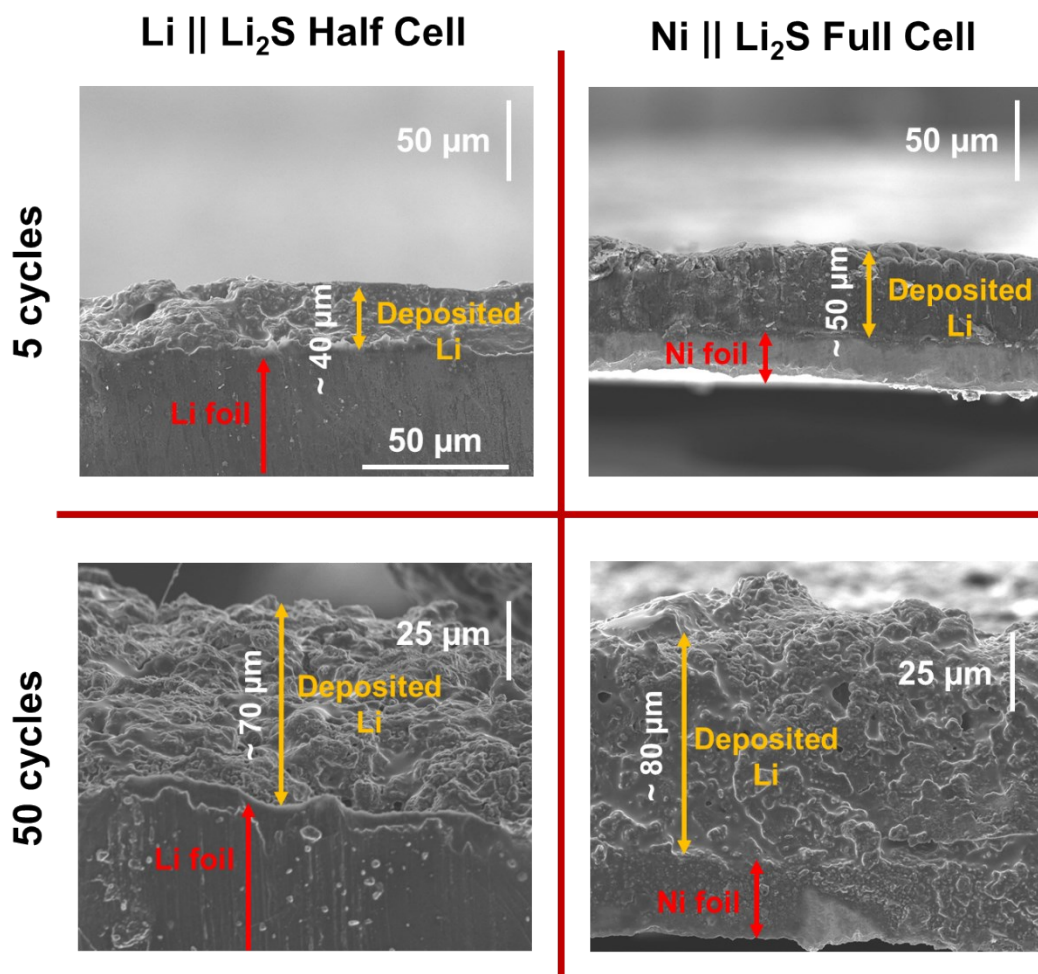

**Fig. S11.** Cross-sectional SEM images of deposited lithium in Li || Li<sub>2</sub>S half cells and anode-free Ni || Li<sub>2</sub>S full cells cycled at C/5 rate after 5 and 50 cycles. After 5 cycles, the deposited lithium shows a slightly smaller thickness (40 μm) in the half cell compared to the full cell (50 μm). By 50 cycles, the thickness of the lithium has grown considerably: 80 μm in the full cell and 70 μm in the half cell. Nonetheless, significant differences in the morphology of the deposited lithium still cannot be discerned, with both cases showing relatively uniform and dense plating of lithium initially and the porosity of the lithium deposit increasing considerably with cycling.
